# Supplementary material
Source: publisher site journal article supplement (https://www.spandidos-publications.com/4961/downloadSupplementary)

Figure S1. C/EBP $\beta$ , GATA1, TBP, PR, SULT1E1 and GR expression in normal and cervical cancer tissues based on the UALCAN database.

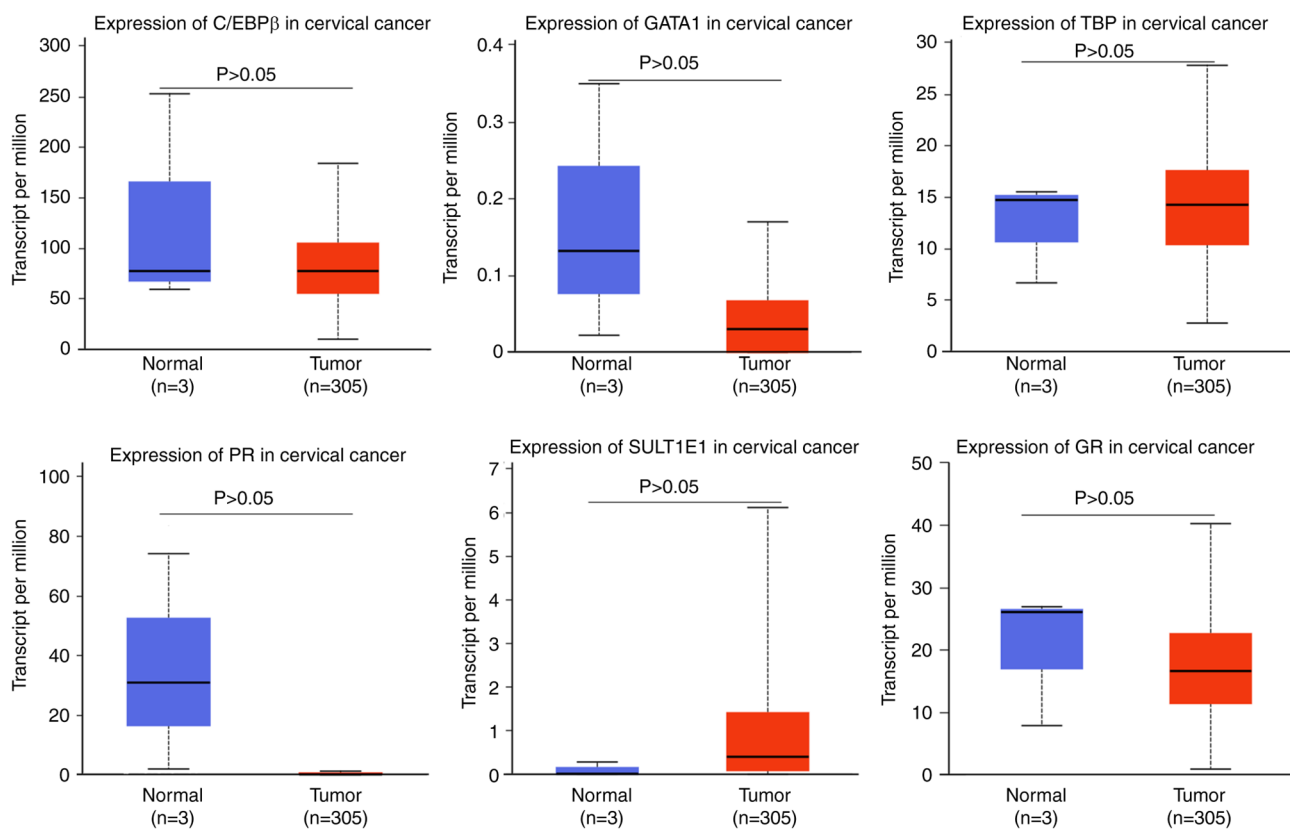

Supplement: Supplementary file 1 [file downloadSupplementary]
